# Supplementary material for: The Role of TLR-2 in Lethal COVID-19 Disease Involving Medullary and Resident Lung Megakaryocyte Up-Regulation in the Microthrombosis Mechanism
Source: MDPI journal article supplement (doi:10.3390/cells13100854), 2024-05-17
Supplement: s1 [file s1]

## Supplementary materials

**Table S1. Patients.** A series of 25 patients with someone comorbidities (Chronic nephropathy, Hypertension, cardiac hypertrophy, Obesity, diabetes mellitus, Obstructive chronic broncho-pneumopathy) who died from a lethal form of Sars-CoV2 infection were studied. 13 males and 12 females, age between 45 and 80 years.

|                       | Age < 50 | Age >50 |
|-----------------------|----------|---------|
| Female COVID-19 cases | 1        | 11      |
| Female Control cases  | 1        | 2       |
| Male Covid-19 cases   | 2        | 11      |
| Male Control cases    | 1        | 7       |

**Table S2.** Summary of clinic-pathological parameters of patients groups according to COVID-19 status.

| VARIABLES                                      | COVID-19 STATUS                                                          |                                       |
|------------------------------------------------|--------------------------------------------------------------------------|---------------------------------------|
|                                                | POSITIVE<br>(total n.25)                                                 | NEGATIVE<br>(total n.11)              |
| Age, Mean $\pm$ SEM                            | 65,76 $\pm$ 2,11                                                         | 68.5 $\pm$ 5,40                       |
| Gender, Male/Female (%)                        | 13/12 (1,08)                                                             | 8/3 (2,66)                            |
| Pathological co-morbidities, Yes/Not (%)       | 24/1 (96)                                                                | 11/11 (100)                           |
| Single co-morbidity/morbidity, (%)             | 12/25 (48)                                                               | 11/11 (100)                           |
| Type of single co-morbidities/morbidity, (%)   | Hypertension 18/25 (72)                                                  | Lung metastatic carcinoma 2/11(18,18) |
|                                                | Cardiac Hypertrophy 8/25 (32)                                            | Primary lung neoplasm 6/11 (54,54)    |
|                                                | OCBP, 3/25 (12)                                                          | Lung emphysema 2/11 (18,18)           |
|                                                | Chronic nephropathy 2/25 (8)                                             | Lung hamartoma 1/11 (9,09)            |
|                                                | Obesity 5/25 (20)                                                        | 0/11 (0)                              |
| Multiple co-morbidities/morbidity, (%)         | 12/25 (48)                                                               | 0/11(0)                               |
| Type of multiple co-morbidities/morbidity, (%) | Hypertension; CH, Cardiac Hypertrophy 6/25 (24)                          |                                       |
|                                                | Obesity, and NIDDM 2/25 (8)                                              |                                       |
|                                                | Obesity, hypertension, and NIDDM 1/25 (4)                                |                                       |
|                                                | Hypertension; CH, Cardiac Hypertrophy, and Chronic nephropathy 7/25 (28) |                                       |
|                                                | Obesity, Hypertension, and Cardiac Hypertrophy 1/25 (4)                  |                                       |

Legend. NIDDM, Type II- *Non-Insulin-Dependent Diabetes Mellitus*; OCBP, Obstructive Chronic Broncho-Pneumopathy; CN, Chronic Nephropathy; O, Obesity; H, Hypertension; CH, Cardiac Hypertrophy.

**Table S3.** Antibody used and experimental conditions.

| ANTIBODY | CLONE             | METHOD                                         |
|----------|-------------------|------------------------------------------------|
| TLR2     | rabbit policlonal | LSAB-HRP/AP, Ventana Benchmark® XT autostainer |

|      |     |                                                   |
|------|-----|---------------------------------------------------|
| CD61 | 2f2 | LSAB-HRP/AP, Ventana<br>Benchmark® XT autostainer |
|------|-----|---------------------------------------------------|
